1

2 **A global co-expression network approach for connecting genes to specialized**

3 **metabolic pathways in plants**

4

5 Jennifer H. Wisecaver<sup>1</sup>, Alexander T. Borowsky<sup>1</sup>, Vered Tzin<sup>2</sup>, Georg Jander<sup>3</sup>, Daniel J.

6 Kliebenstein<sup>4</sup>, and Antonis Rokas<sup>1</sup>

7

8 <sup>1</sup>*Department of Biological Sciences, Vanderbilt University, Nashville, TN 37235, USA*

9 <sup>2</sup>*French Associates Institute for Agriculture and Biotechnology of Drylands, Jacob*

10 *Blaustein Institute for Desert Research, Ben Gurion University, Sede-Boqer Campus*

11 *84990, Israel*

12 <sup>3</sup>*Boyce Thompson Institute for Plant Research, Tower Road, Ithaca, NY 14853, USA*

13 <sup>4</sup>*Department of Plant Sciences, University of California-Davis, One Shields Ave, Davis,*

14 *CA 95616, USA*

15

16

17 *Corresponding author: Antonis Rokas ([antonis.rokas@vanderbilt.edu](mailto:antonis.rokas@vanderbilt.edu), Tel: +1-615-936-*

18 *3892, Fax: +1-615-343-6707)*

19

20

21 *Keywords: secondary metabolism, plant natural product, chemodiversity, glucosinolates,*

22 *benzoxazinoids, terpenoids, steroidal alkaloids*

23

## 24 **Abstract**

25 Plants produce a tremendous diversity of specialized metabolites (SMs) to interact with  
26 and manage their environment. A major challenge hindering efforts to tap this seemingly  
27 boundless source of pharmacopeia is the identification of SM pathways and their  
28 constituent genes. Given the well-established observation that the genes comprising a SM  
29 pathway are co-regulated in response to specific environmental conditions, we  
30 hypothesized that genes from a given SM pathway would form tight associations  
31 (modules) with each other in gene co-expression networks, facilitating their  
32 identification. To evaluate this hypothesis, we used 10 global co-expression datasets—  
33 each a meta-analysis of hundreds to thousands of expression experiments—across eight  
34 plant model organisms to identify hundreds of modules of co-expressed genes for each  
35 species. In support of our hypothesis, 15.3-52.6% of modules contained two or more  
36 known SM biosynthetic genes (e.g., cytochrome P450s, terpene synthases, and chalcone  
37 synthases), and module genes were enriched in SM functions (e.g., glucoside and  
38 flavonoid biosynthesis). Moreover, modules recovered many experimentally validated  
39 SM pathways in these plants, including all six known to form biosynthetic gene clusters  
40 (BGCs). In contrast, genes predicted based on physical proximity on a chromosome to  
41 form plant BGCs were no more co-expressed than the null distribution for neighboring  
42 genes. These results not only suggest that most predicted plant BGCs do not represent  
43 genuine SM pathways but also argue that BGCs are unlikely to be a hallmark of plant  
44 specialized metabolism. We submit that global gene co-expression is a rich, but largely  
45 untapped, data source for discovering the genetic basis and architecture of plant natural  
46 products, which can be applied even without knowledge of the genome sequence.

## 47 **Introduction**

48 Plants, being sessile and therefore at the mercy of their surroundings, harbor many  
49 adaptations that facilitate their interaction with and management of their environment.  
50 One such adaptation is the ability to produce a vast array of specialized metabolites  
51 (SMs), bioactive compounds that are not essential for growth and reproduction but rather  
52 have important ecological roles to combat pathogens, herbivores, and competitors; attract  
53 pollinators and seed dispersers; and resist abiotic stress including fluctuations in  
54 temperature, salinity, and water availability<sup>1</sup>. Humans exploit the SM diversity of plants  
55 for medicines and other natural products; to this end, thousands of plant-derived SMs  
56 have been isolated and biochemically characterized<sup>2</sup>. Yet the genes responsible for the  
57 production and regulation of most SMs across the kingdom Plantae are unknown, which  
58 ultimately limits their potential utility in agricultural, pharmaceutical, and  
59 biotechnological applications<sup>3,4</sup>.

60

61         Given their biomedical and agricultural relevance, it is perhaps surprising that the  
62 constituent genes and pathways involved in biosynthesis of most plant SMs are  
63 unknown<sup>5</sup>. There are two explanations for why this is so; first, SM pathways are highly  
64 variable in the number and functions of genes they contain<sup>1,6</sup>. Second, consistent with  
65 their involvement in the production of ecologically specialized bioactive molecules, SM  
66 genes exhibit narrow taxonomic distributions, are fast evolving both in terms of sequence  
67 divergence and rate of gene family diversification, and display extensive functional  
68 divergence<sup>7-9</sup>. The consequence of this lack of evolutionary and functional conservation

69 is that traditional sequence homology metrics for inferring gene function<sup>10</sup> are weak  
70 predictors of SM pathway composition and function.

71

72 Network biology offers a promising alternative for identifying SM pathways and  
73 their constituent genes. Because SM pathways exist at the interface of organisms and  
74 their environments, the genes within an SM pathway share a common regulatory network  
75 that tightly controls the “where” (e.g., in what tissues) and “when” (e.g., in response to  
76 which ecological conditions) of SM production<sup>1,11,12</sup>. Therefore, gene co-expression data,  
77 as a proxy for co-regulation, have been particularly effective in identifying the  
78 constituent genes that make up many SM pathways<sup>13-21</sup>. Further, given the availability of  
79 data from hundreds to thousands of individual gene expression experiments, integrative  
80 global co-expression networks have the power to predict SM pathways and genes in a  
81 high-throughput fashion<sup>22-24</sup>. However, as measuring gene co-expression on a large scale  
82 was, until recently, a costly and labor-intensive undertaking, the hundreds (or more) of  
83 global gene expression studies in diverse conditions required for global co-expression  
84 network analyses currently exist for only a small minority of plant species<sup>25-27</sup>.

85

86 Another attribute that is characteristic of SM pathways found in bacteria and fungi  
87 is that they can physically co-locate in the genome, forming biosynthetic gene clusters  
88 (BGCs)<sup>28</sup>. As expected of SM pathways, genes within these microbial BGCs are co-  
89 regulated and display strong signatures of co-expression, a pattern that holds true for  
90 functionally characterized as well as for putative BGCs in these genomes<sup>29-33</sup>. As the  
91 proximity of genes on chromosomes is far easier to measure than their co-expression

92 across multiple experimental conditions, bioinformatic algorithms strongly rely this  
93 “clustering” of genes to predict SM pathways in microbial genomes<sup>34-36</sup>. Thus, thousands  
94 of microbial BGCs have been predicted and hundreds validated (i.e., connected to known  
95 products), suggesting that gene proximity is informative for SM pathway identification,  
96 at least in these organisms<sup>37</sup>. Nevertheless, the number of SM pathways in bacteria and  
97 fungi that do not (or only partially) form BGCs is unknown<sup>38-40</sup>.

98

99 In plants, most characterized SM pathways (e.g., glucosinolate biosynthesis) are  
100 not clustered, and their genes are distributed across the genome<sup>41</sup>. More recently,  
101 however, nearly two dozen BGCs responsible for the production of SM defensive  
102 compounds have been identified and functionally characterized from 15 plant species<sup>42</sup>,  
103 raising the possibility that gene proximity could also be used for predicting plant SM  
104 pathways<sup>43</sup>. To this end, computational searches based on gene clustering similar to those  
105 developed for fungal and bacterial genomes postulate the existence of dozens to hundreds  
106 more BGCs across a wide variety of plant genomes<sup>8,44,45</sup>. However, the vast majority of  
107 these putative plant BGCs has not been functionally validated, and the fraction of plant  
108 SM pathways that form BGCs is unclear.

109

110 We hypothesized that plant SM pathways are co-expressed, independently of  
111 being organized into BGCs, in line with their ecological roles that require strong temporal  
112 and spatial co-regulation<sup>1,11,12</sup>. To test our hypothesis, we developed a gene co-expression  
113 network-based approach for plant SM pathway discovery (Figure S1) using data from 10  
114 meta-analyses of global co-expression that collectively contain 21,876 microarray or

115 RNA-Seq experiments across eight plant species. Doing so, we identified dozens to  
116 hundreds of modules of co-expressed genes containing SM biosynthetic genes (e.g.,  
117 cytochrome P450s, terpene synthases, and chalcone synthases) in each species, including  
118 many experimentally validated SM pathways and all validated BGCs in these species. In  
119 contrast, genes predicted to be in BGCs based on their physical proximity did not exhibit  
120 significantly different co-expression patterns than their non-clustered neighbors. Our  
121 results cast doubt on the general utility of approaches for SM pathway identification  
122 based on gene proximity in the absence of functional data and suggest that global gene  
123 co-expression data, when in abundance, are very powerful in the high-throughput  
124 identification of plant SM pathways.

125

## 126 **Results**

127 *Network analysis identifies small, overlapping modules of co-expressed genes in global*  
128 *co-expression networks.* Given that SM pathway genes are often co-regulated in response  
129 to specific environmental conditions, we hypothesized that genes from a given SM  
130 pathway would form tight associations (modules) with each other in gene co-expression  
131 networks. To identify modules of co-expressed SM genes, we accessed three microarray-  
132 and seven RNAseq-based co-expression datasets from ATTED-II<sup>25</sup> and ALCOdb<sup>46</sup> for  
133 eight Viridiplantae species (*Arabidopsis thaliana*, *Brassica rapa*, *Chlamydomonas*  
134 *reinhardtii*, *Glycine max*, *Oryza sativa* Japonica group, *Populus trichocarpa*, *Solanum*  
135 *lycopersicum*, and *Zea mays*; Table S1). Each dataset consisted of a meta-analysis of  
136 hundreds to thousands of experiments measuring global patterns of gene expression in a  
137 wide variety of tissues, environmental conditions, and developmental stages. The number

138 of experiments varied in each dataset, from 172 in the *C. reinhardtii* RNAseq dataset<sup>46</sup> to  
139 15,275 in the *A. thaliana* microarray-based set<sup>25</sup>. Pairwise measurements of gene co-  
140 expression were specified as Mutual Ranks<sup>47</sup> (MRs; calculated as the geometric mean of  
141 the rank of the Pearson's correlation coefficient (PCC) of gene A to gene B and of the  
142 PCC rank of gene B to gene A). For each dataset, we constructed five MR-based  
143 networks, each using a different co-expression threshold for assigning edge weights  
144 (connections) between nodes (genes) in the network. Networks were ordered based on  
145 size (i.e., number of nodes and edges), such that N1 and N5 indicated the smallest and  
146 largest networks, respectively.

147

148 To discover co-expressed gene modules in the eight model plants, we employed  
149 the graph-clustering method ClusterONE<sup>48</sup>, which allowed genes to belong to multiple  
150 modules. This attribute is biologically realistic; many plant metabolic pathways are non-  
151 linear, containing multiple branch points and alternative end products (e.g., terpenoid  
152 biosynthesis pathways<sup>49,50</sup>). Averaging across all 10 co-expression datasets, the number  
153 of genes assigned to modules ranged from 3,251 (13.4% of protein-coding genes) in the  
154 N1 networks to 4,320 (18.2%) in N5 networks (Table S2). The average number of  
155 modules per network decreased with increasing network size, from 573 modules in the  
156 N1 networks to 39 in the N5 networks (Table S2). Conversely, the average module size  
157 (i.e., number of genes within a module) increased with increasing network size (e.g., 7  
158 genes per module in N1 networks, 41 genes per module in N3 networks, and 167 genes  
159 per module in N5 networks). Given our goal to recover distinct SM pathways as modules,  
160 we focused the remaining analyses on the smaller networks (N1-N3) with average

161 module sizes (< 50 genes) consistent with the number of genes typically present in SM  
162 pathways.

163

164 ***Co-expressed gene modules recover known SM pathways and predict hundreds of new***

165 ***SM gene associations.*** To evaluate the correspondence between module genes and genes

166 present in known metabolic pathways, we focused on the 798 genes in 362 *A. thaliana*

167 MetaCyc<sup>51</sup> pathways with an experimentally validated metabolic function (Table S3).

168 Module genes were significantly enriched in many SM-related metabolic functions. Of

169 the 12 higher-order metabolic classes investigated, only the SECONDARY METABOLITES

170 and CELL STRUCTURES biosynthesis classes were significantly enriched in module genes

171 ( $P < 0.0005$ , hypergeometric tests) (Figure 1a). This pattern held true across all networks

172 and datasets investigated (Figure S2 and Table S4). Enrichment of the CELL STRUCTURES

173 biosynthesis class was driven by genes involved in the SECONDARY CELL WALL

174 (specifically LIGNIN) biosynthesis subclasses ( $P < 0.0005$ , hypergeometric tests).

175 Enriched subclasses within the SECONDARY METABOLITES class included those for

176 NITROGEN-CONTAINING SECONDARY COMPOUNDS and FLAVONOID biosynthesis ( $P <$

177  $0.005$ , hypergeometric tests), which contain pathways for glucosinolate and anthocyanin

178 production, respectively. MetaCyc SM pathways that were well recovered as co-

179 expressed modules included those for aliphatic and indolic glucosinolate, camalexin,

180 flavonol, flavonoid, phenylpropanoid, spermidine, and thalianol biosynthesis (Table S5).

181

182 The AMINO ACIDS, CARBOHYDRATES, and COFACTORS/PROSTHETIC

183 GROUPS/ELECTRON CARRIERS biosynthesis classes were significantly depleted in module



184 genes in some, but not all, networks and datasets ( $P < 0.05$ , hypergeometric test) (Figure  
185 1a and Figure S2). None of the other metabolic classes displayed any significant variation  
186 between module and non-module genes (Figure S2 and Table S4).

187

188 To estimate the number of modules that may correspond to SM pathways, we  
189 focused on those that contained two or more non-homologous genes with a significant  
190 match to a curated list of PFAM domains that are found commonly in genes from SM  
191 pathways (Table S6); as some of these “SM-like” modules share genes, we collapsed  
192 them into non-intersecting “meta-modules”. Dozens of SM-like meta-modules were  
193 identified in each species, with the green alga, *C. reinhardtii*, containing the fewest SM-  
194 like meta-modules (27 in N1 networks, 17 in N3 networks), and the field mustard, *B.*  
195 *rapa*, containing the most (120 in N1 networks, 71 in N3 networks) (Figure 1b and Table  
196 S2).

197

198 ***Recovery of the aliphatic glucosinolate biosynthesis pathways in Arabidopsis and***  
199 ***Brassica from global co-expression data.*** To illustrate the utility and power of our  
200 approach for identifying entire SM pathways, we next focused on examining the  
201 correspondence between genes involved in the methionine-derived aliphatic glucosinolate  
202 (metGSL) biosynthesis pathway and genes that comprise co-expression modules  
203 identified by our analyses (Table S7). In *A. thaliana*, the species with the majority of  
204 functional data<sup>52</sup>, co-expression modules recover genes for every biochemical step in this  
205 pathway, from methionine chain elongation to side-chain modification of the  
206 glucosinolate chemical backbone, as well as a pathway-specific transporter and three

207 transcription factors (Figure 2a). For example, in the smallest network N1, 14 / 34  
208 enzymatic genes in the metGSL pathway are recovered in a single 17-gene module; only  
209 3 / 17 genes in this module have not been functionally characterized as involved in  
210 metGSL biosynthesis (Figure 2b). Maximum recovery of the metGSL pathway increased  
211 to 56.3% and 71.9% in the 22-gene and 43-gene modules recovered from networks N2  
212 and N3, respectively (Figure S3 and Table S8). Although the numbers of genes not  
213 known to be involved in metGSL biosynthesis also increased in these modules, several of  
214 the genes that are co-expressed with members of the metGSL pathway perform  
215 associated biochemical processes (Figure 2a). For example, the two adenosine-5'-  
216 phosphosulfate kinase genes, *APK1* and *APK2*, are responsible for activating inorganic  
217 sulfate for use in the metGSL pathway and polymorphisms in these genes alter  
218 glucosinolate accumulation<sup>53</sup>. Similarly, the cytochrome P450 genes, *CYP79B2* and  
219 *CYP79B3*, and the glutathione S-transferase gene, *GSTF9*, are involved in the parallel  
220 pathway for biosynthesis of glucosinolates from tryptophan instead of methionine  
221 (MetaCyc PWY-601)<sup>52</sup>.

222

223 Notably, some genes implicated in metGSL biosynthesis were never recovered in  
224 co-expressed modules, including *GGPI*, which encodes a class I glutamine  
225 amidotransferase-like protein. Microarray-based co-expression data weakly associate  
226 *GGPI* with metGSL biosynthesis in *A. thaliana*, and *GGPI* has been shown to increase  
227 glucosinolate production when heterologously expressed in *Nicotiana benthamiana*<sup>54</sup>.  
228 However, our metGSL-containing modules across all RNAseq-based networks showed  
229 that a different class I glutamine amidotransferase-like gene, *DJIF*, is more highly co-

230 expressed with metGSL biosynthetic genes (Figure 2). Importantly, *DJIF* is not  
231 represented on the *A. thaliana* Affymetrix GeneChip, explaining why *GGP1* and not this  
232 gene was identified as the most correlated one in earlier analyses. However, the  
233 postulated role of both *DJIF* and *GGP1* in metGSL biosynthesis remains to be confirmed  
234 *in planta*.

235

236 The remaining genes in the metGSL pathway that were never recovered in co-  
237 expressed modules all encode secondary enzymes responsible for terminal modifications  
238 to the backbone glucosinolate product<sup>41</sup>. One of these, *AOP2*, encoding a 2-oxoglutarate-  
239 dependent dioxygenase, has been pseudogenized in the *A. thaliana* (ecotype: Columbia)  
240 reference genome<sup>55</sup>. The high level of natural variation present in these terminal  
241 metabolic branches is responsible for the diverse glucosinolates present in different  
242 ecotypes<sup>56,57</sup> but likely also makes it more challenging to connect them to the rest of the  
243 metGSL pathway using global co-expression data (Figure S4).

244

245 Brassicas also produce aliphatic glucosinolates, but a whole genome triplication  
246 event subsequent to their divergence from *A. thaliana*<sup>58</sup> has complicated identification of  
247 functional metGSL genes in these species. To gain insight into the metGSL pathway in *B.*  
248 *rapa*, we cross-referenced our co-expression modules with 59 candidate metGSL genes  
249 identified based on orthology to *A. thaliana* metGSL genes<sup>59</sup>. As in *A. thaliana*, modules  
250 recovered every biochemical step of the *B. rapa* metGSL pathway as well as pathway-  
251 specific transporters and transcription factors (Figure 3, Table S7, and Table S8). Also as  
252 in *A. thaliana*, *DJIF* rather than *GGP1* is co-expressed with other metGSL genes,

253 providing further evidence that the DJ1F enzyme may be the more likely candidate for  
254 the  $\gamma$ -glutamyl peptidase activity in glucosinolate biosynthesis<sup>52</sup>. Furthermore, as several  
255 enzymes are encoded by multiple gene copies in *B. rapa*, we harnessed the power of our  
256 module analysis to identify which of these copies was co-expressed with other metGSL  
257 genes and therefore most likely to be functionally involved in the pathway. For example,  
258 out of the six *MAM* gene copies in *B. rapa*, only *Bra029355* and *Bra013007* were  
259 recovered in metGSL modules (Figure 3 and Figure S5). Module data also suggest that  
260 the glutathione S-transferase class tau (GSTU) activity is one step of the core pathway  
261 that may differ between the two species. Specifically, in *A. thaliana*, *GSTU20* is thought  
262 to encode this reaction, and this gene was recovered in metGSL modules in our analysis  
263 (Figure 2a). However, this association was not recovered in *B. rapa*. Instead, three  
264 paralogous GSTUs (*Bra003647*, *Bra026679*, and *Bra026680*), corresponding to the *A.*  
265 *thaliana* *GSTU23* and *GSTU25* genes, respectively, formed modules with metGSL genes,  
266 making these genes good candidates for investigation of GSTU activity in *B. rapa*  
267 (Figure 3 and Figure S6).

268

269 ***Modules recover functionally characterized BGCs and identify associated, unclustered***  
270 ***genes.*** We next investigated whether our approach also recovered BGCs by examining  
271 whether our co-expression modules recovered the six functionally characterized BGCs in  
272 these eight plant genomes (Table S9). All six BGCs were recovered in our module  
273 analysis (Table S8). Specifically, co-expression modules recovered all genes comprising  
274 the BGCs involved in the production of the triterpenoids marneral<sup>60</sup> (3 / 3 genes; Figure  
275 4a) and thaliaol<sup>61</sup> (4 / 4 genes; Figure 4b) in *A. thaliana* and the diterpenoid

276 momilactone<sup>62</sup> (5 / 5 genes; Figure 4c) in *O. sativa*. Modules recovered 7 / 9 genes in the  
277 phytocassane<sup>63</sup> diterpene cluster in *O. sativa* (rice); the *OsKSL5* and *CYP71Z6* genes  
278 forming a terpene synthase-cytochrome p450 pair of genes were strongly co-expressed  
279 with each other but not with the rest of the pathway (Figure 4d). The two triterpenoid  
280 BGCs in *A. thaliana* were typically combined into the same co-expression module; the  
281 same pattern was observed for the two diterpenoid BGCs in *O. sativa* (Figure S7 and  
282 Figure S8). Genes within these BGCs were also strongly co-expressed with additional  
283 genes located outside the BGC boundaries, including one putative transcription factor and  
284 several putative transporters (Figure S7 and Figure S8).

285

286         Seven of eight genes in the partially clustered pathway for production of the  
287 steroidal alkaloid  $\alpha$ -tomatine in *S. lycopersicum*<sup>64</sup> (tomato) were recovered by our co-  
288 expression analysis (Figure 4e). Only the glucosyltransferase gene, *GAME2*, encoding the  
289 last enzymatic reaction in the proposed  $\alpha$ -tomatine pathway, showed a conspicuously  
290 different expression profile, consistent with previous reports<sup>64,65</sup>. Several  
291 glucosyltransferase genes paralogous to *GAME2* were strongly co-expressed with the rest  
292 of the genes in this pathway (Figure S9), but whether or not these genes participate in  $\alpha$ -  
293 tomatine biosynthesis is yet to be determined. Additional genes strongly co-expressed  
294 with the rest of the  $\alpha$ -tomatine pathway include, among others, one putative transcription  
295 factor, several possible metabolite transporters, and a cellulose synthase-like gene located  
296 adjacent to the BGC (Figure 4e and Figure S9).

297

298           Lastly, five of the six genes in the benzoxazinoid 2,4-dihydroxy-7-methoxy-1,4-  
299 benzoxazin-3-one (DIMBOA)<sup>66</sup> cluster in *Z. mays* formed co-expression modules in our  
300 analysis (Figure 4f). Specifically, the first five genes in the DIMBOA pathway (*Bx1*-  
301 *Bx5*), responsible for the biosynthesis of the precursor 2,4-dihydroxy-1, 4-benzoxazin-3-  
302 one (DIBOA), formed modules with each other but not with the final gene in the BGC,  
303 *Bx8* (Figure S10).

304

305           Similar to the modifying genes of the metGSL pathway in *A. thaliana*, terminal  
306 *Bx* genes appear to have unique gene expression signatures distinct from the core  
307 pathway. For example, DIBOA is modified to DIMBOA by the action of two additional  
308 unclustered genes (*Bx6* and *Bx7*)<sup>67</sup>, neither of which was assigned to modules with core  
309 genes or each other. Toxic DIBOA/DIMBOA is transformed into stable glucoside,  
310 DIBOA-Glc/DIMBOA-Glc, by glucosyltransferases (*Bx8* and *Bx9*), which were likewise  
311 not assigned to modules in our analysis. However, a gene adjacent to the DIMBOA BGC,  
312 encoding an uncharacterized glucosyltransferase (GT; *GRMZM2G085854*) with 27%  
313 amino acid identity to *Bx8*, does belong to the same module as the core *Bx* genes in  
314 network N3 (Figure S10), but the MR scores of this gene to core *Bx* genes are noticeably  
315 weaker than those between the core *Bx* genes (Figure 4f). Additional *Bx* genes (*Bx10*-  
316 *Bx14*), which are not part of the BGC and are responsible for the biosynthesis of modified  
317 benzoxazinoid compounds (e.g., HDMBOA-Glc, DIM<sub>2</sub>BOA-Glc)<sup>68,69</sup>, were also not  
318 assigned to modules in our analysis (Figure S10); this pattern is similar to that observed  
319 with the terminal reactions of the metGSL biosynthesis pathway.

320

321 *Bx1* is thought to represent the first committed step in benzoxazinoid biosynthesis,  
322 encoding an indole-3-glycerolphosphate lyase (IGL) that converts indole-3-  
323 glycerolphosphate to indole. However, in our module analysis, an additional gene co-  
324 expressed with the core *Bx* genes is an indole-3-glycerolphosphate synthase (IGPS;  
325 *GRMZM2G106950*), which catalyzes the reaction directly upstream of *Bx1* (Figure S10).  
326 Two additional genes encoding indole-3-glycerolphosphate synthases are present in *Z.*  
327 *mays* (*GRMZM2G169516* and *GRMZM2G145870*), but neither was strongly co-  
328 expressed with those in the benzoxazinoid pathway. Similarly, the two additional  
329 paralogs to *Bx1* in *Z. mays* (*TSA* and *IGL*, responsible for the production of tryptophan  
330 and volatile indole, respectively) formed independent co-expression modules, consistent  
331 with their distinct metabolic and ecological roles (Figure S10)<sup>70,71</sup>. The inclusion of an  
332 unlinked IGPS gene in the benzoxazinoid co-expression modules suggests that the first  
333 committed step in the biosynthesis pathway may start one reaction earlier than previously  
334 predicted based on the DIMBOA BGC gene content.

335

336 To test whether *GT* and *IGPS* are likely to be involved in benzoxazinoid  
337 biosynthesis, we measured their gene expression responses to two different types of  
338 insect herbivory (aphid and caterpillar), ecological conditions under which benzoxazinoid  
339 biosynthesis genes are typically induced<sup>72,73</sup>. *GT* showed gene expression responses  
340 similar to *Bx8* and *Bx9*, being induced within the first few hours after the introduction of  
341 insect herbivores (Figure S11). Although the median fold change of expression relative to  
342 controls is small (< 5) for all three glucosyltransferases, this result is consistent with a  
343 putative role of *GT* in creating stable benzoxazinoid glucosides along with *Bx8* and *Bx9*.

344 *IGPS* was also significantly induced in response to insect herbivory, mostly notably in the  
345 caterpillar feeding experiment in which *IGPS* expression increased over 50-fold during a  
346 24-hour period (Figure S11). In contrast, the two other indole-3-glycerolphosphate  
347 synthase genes showed little to no response to herbivory, consistent with this *IGPS*  
348 encoding a specialized enzyme involved in benzoxazinoid biosynthesis or volatile indole,  
349 which is also induced by caterpillar herbivory<sup>74</sup>.

350

351 ***Bioinformatically predicted BGCs in plants do not form co-expression modules and are***  
352 ***typically not co-expressed.*** To examine whether putative BGCs (i.e., predicted based on  
353 physical clustering and with no known associated products) show evidence of co-  
354 regulation in response to specific environmental conditions, we investigated whether they  
355 were also recovered in our co-expression network analysis. We found that two different  
356 sets of putative BGCs showed little to no co-expression (Figure S12). Specifically, both  
357 the 137 Enzyme Commission (EC)-based BGCs predicted by Chae et al.<sup>8</sup> and the 51  
358 BGCs predicted by the antibiotics and secondary metabolism analysis shell  
359 (antiSMASH)<sup>34</sup> had median MR scores of 9,670 and 10,890, respectively. Furthermore,  
360 the EC-based BGCs' distribution of co-expression was similar to that of the control  
361 distribution of neighboring genes ( $P = 0.187$ , Wilcoxon rank sum test), whereas the co-  
362 expression of antiSMASH BGCs was significantly lower than that of the control ( $P =$   
363  $0.027$ ) (Figure 5a and Table S10). In contrast, the six validated BGCs had a median MR  
364 score of 17.4 and were significantly more co-expressed than the control ( $P = 3.20 \times 10^{-4}$ )  
365 (Figure 5a and Table S10). Similarly, the 13 terpene synthase-cytochrome P450 (TS-  
366 CYP) pairs identified by Boutanaev et al.<sup>44</sup> were variably co-expressed with a median



367 MR score of 45. Although two of the 13 TS-CYP pairs were negatively correlated in their  
368 expression, the TS-CYP distribution was still significantly better than the control ( $P =$   
369  $2.73 \times 10^{-4}$ ) (Figure 5a and Table S10).

370

371 Not surprisingly, given the lack of co-expression, putative BGCs, by and large,  
372 did not form co-expression modules, with only 7 / 188 putative BGCs overlapping by  
373 three genes or more with co-expression modules. In contrast, 78 / 188 putative BGCs  
374 overlapped with co-expression modules by only one gene, indicating that the genes  
375 within these BGCs were more strongly co-expressed with genes outside their cluster than  
376 with those inside (Figure 5b and Table S8).

377

378 An example of the poor association between co-expression modules and putative  
379 BGCs comes from the antiSMASH-predicted BGC30. Only 2 / 6 genes in BGC30  
380 showed strong pairwise co-expression: a TS-CYP pair also identified by Boutanaev et al.  
381 and labeled PAIR6 (Figure 5c). The terpene synthase (AT5G44630) of PAIR6 is known  
382 to be involved in the production of sesquiterpenoid flower volatiles<sup>75</sup>. This functional  
383 annotation is supported by our module analysis, which assigned PAIR6 to a co-  
384 expression module consisting of 46 physically unlinked genes that are significantly  
385 enriched for gene ontology terms associated with flower development (Figure 5d and  
386 Table S11). A second example comes from the EC-mapped BGC130. None of the genes  
387 in this BGC were strongly co-expressed with each other (Figure S12). Instead, one gene  
388 in the BGC, *GSTU20*, is a known participant in metGSL biosynthesis, an association that  
389 is recovered by co-expression modules in our analysis (Figure 2 and Table S8).

390

## 391 **Discussion**

392 An enormous number of novel plant SMs awaits discovery and characterization<sup>4</sup>. Yet,  
393 due to their rapid evolution and narrow taxonomic distribution<sup>7-9</sup>, SM pathways and  
394 genes are often unknown, slowing the pace of discovery. Gene co-expression and  
395 chromosomal proximity are two omics-level traits that can be harnessed for high-  
396 throughput prediction of SM pathways and genes<sup>4</sup>, but their general utility remained  
397 unknown. By examining 10 global co-expression datasets—each a meta-analysis of 172  
398 to 15,275 transcriptome experiments—across eight plant model organisms, we found that  
399 gene co-expression was powerful in identifying known SM pathways, irrespective of the  
400 location of their genes in the genome, as well as in predicting novel SM gene  
401 associations. Below, we discuss why gene proximity may not be a reliable method of SM  
402 pathway identification in plant genomes as well as enumerate the advantages and caveats  
403 of our co-expression network-based approach.

404

405 It is well established that genes in SM pathways are spatially and temporally  
406 regulated in response to diverse ecological conditions; arguably, this shared regulatory  
407 program is one of the defining characteristics uniting genes belonging to SM  
408 pathways<sup>1,11,12</sup>. Furthermore, numerous gene expression studies of the genes participating  
409 in diverse SM pathways, including BGCs, from diverse organisms show that SM pathway  
410 genes typically share similar gene expression patterns (i.e., they are co-expressed)  
411 <sup>21,32,33,64,65,76,77</sup>. Simply put, gene co-expression can be predictive of membership in a  
412 given SM pathway. The question then is whether one can employ genome-wide or global

413 gene expression data to predict SM pathways in a high-throughput fashion. The results of  
414 our analyses suggest that this is the case; modules in global co-expression networks  
415 constructed from genome-wide expression studies across myriads of different conditions  
416 in *A. thaliana* were significantly enriched in genes associated with diverse SM-related  
417 metabolic functions (Figure 1a). Moreover, modules recovered many experimentally  
418 validated SM pathways in these plants (Table S5 and Table S8), including the six known  
419 to form BGCs (Figures 4).

420

421 It is also well established that gene arrangement in plant genomes is not random<sup>78</sup>.  
422 For example, as much as 60% of metabolic pathways in *A. thaliana* (as measured by  
423 KEGG) show statistically significant higher levels of physical proximity in the genome  
424 than expected by chance<sup>79</sup>. The most extreme version of this “closer than expected” gene  
425 arrangement is the growing list BGCs involved in plant SM biosynthesis<sup>42</sup>. While the  
426 statistical significance of this pattern is non-debatable, the degree to which gene  
427 arrangement is predictive of genes’ participation in the same pathway is not immediately  
428 obvious. For example, the genes of many known plant SM pathways<sup>52,80</sup> do not form  
429 BGCs, while other pathways consist of a combination of clustered and unclustered  
430 genes<sup>64,69,81</sup>. Complicating matters further, SM pathways may form a BGC in some  
431 species but not others<sup>82</sup>. Given that the majority of known plant SM pathways does not  
432 form BGCs, it is perhaps not surprising that nearly all putative plant SM BGCs, which  
433 were predicted based solely on gene proximity, were not co-expressed (Figure 5).

434

435           We interpret this absence of co-expression as evidence that most of these putative  
436 BGCs likely do not correspond with actual SM pathways and that gene proximity is  
437 insufficient to be used as the primary input for predicting SM pathways in plant genomes.  
438 Admittedly, the strength of this argument rests on whether the global co-expression  
439 networks that we have constructed accurately capture the spatial and temporal regulation  
440 of BGCs in response to the diverse ecological conditions plants experience, which is at  
441 least partially dependent on the number and types of the conditions sampled<sup>83</sup>. For  
442 example, genes in a BGC or pathway that are never expressed or are not variably  
443 expressed across conditions would not be correlated with each other in our analysis.  
444 Although this is a valid concern, the hundreds to thousands of conditions<sup>25</sup> used to  
445 construct each co-expression dataset (Table S1) as well as the recovery of many known  
446 SM pathways from these organisms (Table S5 and Table S8), suggest that its effect is  
447 unlikely to influence our major findings. Going forward, increased resolution of BGCs  
448 and SM pathways in co-expression networks will require the inclusion of data from more  
449 tissues, time points, and environmental conditions during which SM genes and pathways  
450 are likely to vary in their regulation, for example different types of insect herbivory<sup>69,72,84</sup>  
451 and complex field conditions<sup>85</sup>.

452

453           Another caveat associated with predicting SM pathways from global co-  
454 expression networks is that SM pathways whose expression profiles are highly similar  
455 would be predicted to comprise a single pathway. This will likely be a more common  
456 occurrence, and examples of this behavior are present in our results. Specifically, the two  
457 triterpenoid BGCs in *A. thaliana* were almost always combined in the same co-

458 expression module, regardless of the network investigated (Figure S7); the same was true  
459 for the two diterpenoid BGCs in *O. sativa* (Figure S8). Although predicting individual  
460 SM pathways is obviously ideal, the lumping of multiple pathways into one may in some  
461 cases reveal novel biology. For example, such a pattern could also be indicative of  
462 crosstalk between SM pathways or BGCs, or that multiple SM pathways are employed in  
463 response to the same set of environmental conditions.

464

465         The final caveat is that our approach will not be as powerful in cases where some  
466 of the genes in the pathway are not under the same regulatory program as the others. For  
467 example, we noted that the genes encoding terminal modification enzymes, such as the  
468 genes for side-chain modification of glucosinolates (Figure S4) or the UDP-  
469 glucosyltransferases in *S. lycopersicum* (*GAME2*) and *Z. mays* (*Bx8-Bx14*), had  
470 expression profiles that were quite different from those of core pathway genes; thus, they  
471 were often not recovered in the same modules as their corresponding core SM pathway  
472 genes. It is possible that additional sampling of appropriate expression conditions could  
473 allow for recovery of these terminal metabolic branches in co-expression modules that  
474 include the rest of the pathway. However, the terminal SM genes and products can be  
475 under balancing or diversifying selection<sup>56</sup>; moreover, the core and terminal steps in an  
476 SM pathway may take place in different tissues<sup>86</sup>. In cases like these, the terminal  
477 metabolic branches and core SM pathway may be identified as distinct co-expression  
478 modules in global co-expression networks no matter how many conditions are sampled.

479

480 In summary, our results indicate that generating and constructing global gene co-  
481 expression networks is a powerful and promising approach to the challenge of high-  
482 throughput prediction and study of plant SM pathways. Global gene co-expression  
483 networks can straightforwardly be constructed for any plant, model or non-model, as long  
484 as the organism's transcriptome can be sampled under a range of conditions. In principle,  
485 this would not require a genome sequence, only a high quality *de novo* transcriptome  
486 assembly. Furthermore, global gene co-expression networks could be used in conjunction  
487 with other high-throughput data types (e.g., proteomics, metabolomics). We believe that  
488 combining high throughput transcriptomics across ecological conditions with network  
489 biology will transform our understanding of the genetic basis and architecture of plant  
490 natural products and usher in a new era of exploration of their chemodiversity.

491

## 492 **Materials and Methods**

493 Genome annotations, protein sequences, and gene co-expression values, measured using  
494 Pearson's correlation coefficient (PCC) and mutual rank (MR), across the eight plant  
495 species were downloaded from the ATTED-II<sup>25</sup>, ALCOdb<sup>46</sup>, NCBI RefSeq and JGI  
496 Genome Portal databases (Table S1). ATTED-II co-expression datasets with less than  
497 50% coverage of the target genome were excluded. The MR score for two example genes  
498 A and B is given by the formula,

$$MR_{(AB)} = \sqrt{Rank_{(A \rightarrow B)} \times Rank_{(B \rightarrow A)}}$$

499 where  $Rank_{(A \rightarrow B)}$  is the rank of gene B in a PCC-ordered list of gene A against all other  
500 genes in the microarray or RNAseq meta-analysis; similarly,  $Rank_{(B \rightarrow A)}$  is the rank of  
501 gene A in a PCC-ordered list of gene B against all other genes, with smaller MR scores

502 indicating stronger co-expression between gene pairs<sup>47</sup>. MR scores were converted to  
503 network edge weights using 5 different rates of exponential decay (Figure S1). Any edge  
504 with  $PCC < 0.3$  or edge weight  $< 0.01$  was excluded.

505

506 Comparison of MR- and PCC-based networks, showed that the MR-based  
507 networks were more comparable between species and datasets. For example, PCC-based  
508 networks were more sensitive (variable) to differences in the number of experimental  
509 samples and genome coverage between datasets in the two species that had microarray-  
510 and RNAseq-based datasets (*A. thaliana* and *O. sativa*). In contrast, the MR-based  
511 networks were more robust to dataset differences (Figure S13), in agreement with the  
512 original description of the MR metric by Obayashi and Kinoshita<sup>47</sup>. Moreover, MR-based  
513 networks were remarkably consistent with respect to the number of genes they contained;  
514 in contrast, PCC-based networks sometimes varied by orders of magnitude in the number  
515 of genes included (Figure S13), Finally, MR-based networks consistently included nearly  
516 all genes in a given dataset, regardless of the MR threshold stringency employed; that  
517 was not the case with PCC-based networks (Figure S13 and Table S2). For these reasons,  
518 we chose to focus the investigation on the MR-based networks.

519

520 Modules of tightly co-expressed genes were detected using ClusterONE using  
521 default parameters<sup>48</sup>. Modules with ClusterONE *P* value  $> 0.1$  were excluded. Modules  
522 were considered ‘SM-like’ if they contained 2 or more non-homologous genes with a  
523 significant match to a curated list of PFAM domains present in experimentally verified  
524 (Evidence = ‘EV-EXP’) genes assigned to MetaCyc<sup>51</sup> SECONDARY BIOSYNTHESIS

525 pathways (hmmsearch<sup>87</sup> using default inclusion thresholds; Table S6). SM-like modules  
526 were then binned into meta-modules of non-overlapping gene sets.

527

528 Bioinformatically-predicted BGCs were obtained from the published literature<sup>8,44</sup>  
529 and by running the *A. thaliana* reference genome (TAIR10; each protein-coding gene was  
530 represented by its longest transcript) through antiSMASH v3.0.4<sup>34</sup> with the --clusterblast  
531 --subclusterblast --smcogs options enabled. Average co-expression of each gene set  
532 (module or BGC) was calculated as the average MR score across all gene pairs in the set.

533

534 All statistical analyses were performed in R, including dhyper (hypergeometric),  
535 wilcox.test (Wilcoxon Rank Sum), p.adjust (Benjamini and Hochberg adjusted *P*-value)  
536 from the stats package. Network maps were drawn using a Fruchterman-Reingold force-  
537 directed layout using the igraph R package (<http://igraph.org>).

538

### 539 **Data Availability**

540 All co-expression modules identified in our analysis are included in the supplemental  
541 files online (Dataset S1).

542

### 543 **Acknowledgements**

544 We thank members of the Rokas lab and the National Science Foundation's Plant  
545 Genome Research Program for helpful discussions. This work was conducted in part  
546 using the resources of the Advanced Computing Center for Research and Education at  
547 Vanderbilt University. This material is based upon work supported by the National



548 Science Foundation (<http://www.nsf.gov>) under Grants IOS-1401682 to JHW, DEB-  
549 1442113 to AR, and IOS-1339237 to GJ.

550

### 551 **Author Contributions**

552 Conceived and designed the experiments: JHW VT GJ DJK AR. Performed the  
553 experiments: JHW ATB VT. Analyzed the data: JHW ATB VT GJ DJK AR. Contributed  
554 reagents/materials/analysis tools: JHW VT GJ AR. Wrote the paper: JHW AR. All  
555 authors read, commented on, and approved the manuscript.

## 556 References

- 557 1. Hartmann, T. From waste products to ecochemicals: fifty years research of plant  
558 secondary metabolism. *Phytochemistry* **68**, 2831–2846 (2007).
- 559 2. Raskin, I. *et al.* Plants and human health in the twenty-first century. *Trends in*  
560 *Biotechnology* **20**, 522–531 (2002).
- 561 3. McChesney, J. D., Venkataraman, S. K. & Henri, J. T. Plant natural products: back  
562 to the future or into extinction? *Phytochemistry* **68**, 2015–2022 (2007).
- 563 4. Wurtzel, E. T. & Kutchan, T. M. Plant metabolism, the diverse chemistry set of the  
564 future. *Science* **353**, 1232–1236 (2016).
- 565 5. De Luca, V., Salim, V., Atsumi, S. M. & Yu, F. Mining the biodiversity of plants:  
566 a revolution in the making. *Science* **336**, 1658–1661 (2012).
- 567 6. D'Auria, J. C. & Gershenzon, J. The secondary metabolism of *Arabidopsis*  
568 *thaliana*: growing like a weed. *Curr Opin Plant Biol* **8**, 308–316 (2005).
- 569 7. Pichersky, E. & Lewinsohn, E. Convergent evolution in plant specialized  
570 metabolism. *Annu Rev Plant Biol* **62**, 549–566 (2011).
- 571 8. Chae, L., Kim, T., Nilo-Poyanco, R. & Rhee, S. Y. Genomic signatures of  
572 specialized metabolism in plants. *Science* **344**, 510–513 (2014).
- 573 9. Mukherjee, D., Mukherjee, A. & Ghosh, T. C. Evolutionary rate heterogeneity of  
574 primary and secondary metabolic pathway genes in *Arabidopsis thaliana*. *Genome*  
575 *Biol. Evol.* **8**, 17–28 (2016).
- 576 10. Eisen, J. A. Phylogenomics: improving functional predictions for uncharacterized  
577 genes by evolutionary analysis. *Genome Res.* **8**, 163–167 (1998).
- 578 11. Tohge, T. & Fernie, A. R. Co-expression and co-responses: within and beyond  
579 transcription. *Frontiers in Plant Science* **3**, 248 (2012).
- 580 12. Grotewold, E. Plant metabolic diversity: a regulatory perspective. *Trends Plant Sci*  
581 **10**, 57–62 (2005).
- 582 13. Lau, W. & Sattely, E. S. Six enzymes from mayapple that complete the  
583 biosynthetic pathway to the etoposide aglycone. *Science* **349**, 1224–1228 (2015).
- 584 14. Rajniak, J., Barco, B., Clay, N. K. & Sattely, E. S. A new cyanogenic metabolite in  
585 *Arabidopsis* required for inducible pathogen defence. **525**, 376–379 (2015).
- 586 15. Yonekura-Sakakibara, K. *et al.* Comprehensive flavonol profiling and  
587 transcriptome coexpression analysis leading to decoding gene-metabolite  
588 correlations in *Arabidopsis*. *Plant Cell* **20**, 2160–2176 (2008).
- 589 16. Sawada, Y. *et al.* *Arabidopsis* bile acid:sodium symporter family protein 5 is  
590 involved in methionine-derived glucosinolate biosynthesis. *Plant Cell Physiol.* **50**,  
591 1579–1586 (2009).
- 592 17. Hirai, M. Y. *et al.* Omics-based identification of *Arabidopsis* Myb transcription  
593 factors regulating aliphatic glucosinolate biosynthesis. *Proc. Natl. Acad. Sci.*  
594 *U.S.A.* **104**, 6478–6483 (2007).
- 595 18. Maeda, H., Yoo, H. & Dudareva, N. Prephenate aminotransferase directs plant  
596 phenylalanine biosynthesis via arogenate. *Nat. Chem. Biol.* **7**, 19–21 (2011).
- 597 19. Naoumkina, M. A. *et al.* Genomic and coexpression analyses predict multiple  
598 genes involved in triterpene saponin biosynthesis in *Medicago truncatula*. *Plant*  
599 *Cell* **22**, 850–866 (2010).
- 600 20. Fridman, E. & Pichersky, E. Metabolomics, genomics, proteomics, and the

- 601 identification of enzymes and their substrates and products. *Curr Opin Plant Biol*  
602 **8**, 242–248 (2005).
- 603 21. Itkin, M. *et al.* The biosynthetic pathway of the nonsugar, high-intensity sweetener  
604 mogroside V from *Siraitia grosvenorii*. *Proc. Natl. Acad. Sci. U.S.A.* **113**, E7619–  
605 E7628 (2016).
- 606 22. Horan, K. *et al.* Annotating genes of known and unknown function by large-scale  
607 coexpression analysis. *Plant Physiol* **147**, 41–57 (2008).
- 608 23. Mentzen, W. I. & Wurtele, E. S. Regulon organization of *Arabidopsis*. *BMC Plant*  
609 *Biol* **8**, 99 (2008).
- 610 24. Mao, L., Van Hemert, J. L., Dash, S. & Dickerson, J. A. *Arabidopsis* gene co-  
611 expression network and its functional modules. *BMC Bioinformatics* **10**, 346  
612 (2009).
- 613 25. Aoki, Y., Okamura, Y., Tadaka, S., Kinoshita, K. & Obayashi, T. ATTED-II in  
614 2016: A plant coexpression database towards lineage-specific coexpression. *Plant*  
615 *Cell Physiol.* **57**, e5 (2016).
- 616 26. Hiss, M. *et al.* Large-scale gene expression profiling data for the model moss  
617 *Physcomitrella patens* aid understanding of developmental progression, culture  
618 and stress conditions. *Plant J.* **79**, 530–539 (2014).
- 619 27. Zimmermann, P. *et al.* Genevestigator transcriptome meta-analysis and biomarker  
620 search using rice and barley gene expression databases. *Mol Plant* **1**, 851–857  
621 (2008).
- 622 28. Osbourn, A. Secondary metabolic gene clusters: evolutionary toolkits for chemical  
623 innovation. *Trends Genet.* **26**, 449–457 (2010).
- 624 29. Yu, J. *et al.* Tight control of mycotoxin biosynthesis gene expression in  
625 *Aspergillus flavus* by temperature as revealed by RNA-Seq. *Fems Microbiol Lett*  
626 **322**, 145–149 (2011).
- 627 30. Lawler, K., Hammond-Kosack, K., Brazma, A. & Coulson, R. M. R. Genomic  
628 clustering and co-regulation of transcriptional networks in the pathogenic fungus  
629 *Fusarium graminearum*. *BMC Syst Biol* **7**, 52 (2013).
- 630 31. Gibbons, J. G. *et al.* Global transcriptome changes underlying colony growth in the  
631 opportunistic human pathogen *Aspergillus fumigatus*. *Eukaryot. Cell* **11**, 68–78  
632 (2012).
- 633 32. Gibbons, J. G. *et al.* The evolutionary imprint of domestication on genome  
634 variation and function of the filamentous fungus *Aspergillus oryzae*. *Curr. Biol.*  
635 **22**, 1403–1409 (2012).
- 636 33. Lind, A. L., Smith, T. D., Saterlee, T., Calvo, A. M. & Rokas, A. Regulation of  
637 secondary metabolism by the Velvet complex is temperature-responsive in  
638 *Aspergillus. G3 (Bethesda)* **6**, 4023–4033 (2016).
- 639 34. Weber, T. *et al.* antiSMASH 3.0—a comprehensive resource for the genome mining  
640 of biosynthetic gene clusters. *Nucleic Acids Res.* **43**, W237–W243 (2015).
- 641 35. Khaldi, N. *et al.* SMURF: Genomic mapping of fungal secondary metabolite  
642 clusters. *Fungal Genet. Biol.* **47**, 736–741 (2010).
- 643 36. Cimermancic, P. *et al.* Insights into secondary metabolism from a global analysis  
644 of prokaryotic biosynthetic gene clusters. *Cell* **158**, 412–421 (2014).
- 645 37. Hadjithomas, M. *et al.* IMG-ABC: A knowledge base to fuel discovery of  
646 biosynthetic gene clusters and novel secondary metabolites. *MBio* **6**, e00932–15

- 647 (2015).
- 648 38. Bradshaw, R. E. *et al.* Fragmentation of an aflatoxin-like gene cluster in a forest  
649 pathogen. *New Phytol* **198**, 525–535 (2013).
- 650 39. Sanchez, J. F. *et al.* Genome-based deletion analysis reveals the prenyl xanthone  
651 biosynthesis pathway in *Aspergillus nidulans*. *J. Am. Chem. Soc.* **133**, 4010–4017  
652 (2011).
- 653 40. Lo, H.-C. *et al.* Two separate gene clusters encode the biosynthetic pathway for  
654 the meroterpenoids austinol and dehydroaustinol in *Aspergillus nidulans*. *J. Am.*  
655 *Chem. Soc.* **134**, 4709–4720 (2012).
- 656 41. Kliebenstein, D. J. & Osbourn, A. Making new molecules - evolution of pathways  
657 for novel metabolites in plants. *Curr Opin Plant Biol* **15**, 415–423 (2012).
- 658 42. Nützmann, H.-W., Huang, A. & Osbourn, A. Plant metabolic clusters - from  
659 genetics to genomics. *New Phytol* (2016). doi:10.1111/nph.13981
- 660 43. Medema, M. H. & Osbourn, A. Computational genomic identification and  
661 functional reconstitution of plant natural product biosynthetic pathways. *Nat Prod*  
662 *Rep* **33**, 951–962 (2016).
- 663 44. Boutanaev, A. M. *et al.* Investigation of terpene diversification across multiple  
664 sequenced plant genomes. *Proc. Natl. Acad. Sci. U.S.A.* **112**, E81–E88 (2015).
- 665 45. Castillo, D. A., Kolesnikova, M. D. & Matsuda, S. P. T. An effective strategy for  
666 exploring unknown metabolic pathways by genome mining. *J. Am. Chem. Soc.*  
667 **135**, 5885–5894 (2013).
- 668 46. Aoki, Y., Okamura, Y., Ohta, H., Kinoshita, K. & Obayashi, T. ALCOdb: Gene  
669 coexpression database for microalgae. *Plant Cell Physiol.* **57**, e3–e3 (2016).
- 670 47. Obayashi, T. & Kinoshita, K. Rank of correlation coefficient as a comparable  
671 measure for biological significance of gene coexpression. *DNA Res* **16**, 249–260  
672 (2009).
- 673 48. Nepusz, T., Yu, H. & Paccanaro, A. Detecting overlapping protein complexes in  
674 protein-protein interaction networks. *Nat Methods* **9**, 471–472 (2012).
- 675 49. Guo, J. *et al.* Cytochrome P450 promiscuity leads to a bifurcating biosynthetic  
676 pathway for tanshinones. *New Phytol* **210**, 525–534 (2016).
- 677 50. Lodeiro, S. *et al.* An oxidosqualene cyclase makes numerous products by diverse  
678 mechanisms: A challenge to prevailing concepts of triterpene biosynthesis. *J. Am.*  
679 *Chem. Soc.* **129**, 11213–11222 (2007).
- 680 51. Caspi, R. *et al.* The MetaCyc database of metabolic pathways and enzymes and the  
681 BioCyc collection of pathway/genome databases. *Nucleic Acids Res.* **44**, D471–  
682 D480 (2016).
- 683 52. Sønderby, I. E., Geu-Flores, F. & Halkier, B. A. Biosynthesis of glucosinolates –  
684 gene discovery and beyond. *Trends Plant Sci* **15**, 283–290 (2010).
- 685 53. Mugford, S. G. *et al.* Disruption of adenosine-5'-phosphosulfate kinase in  
686 *Arabidopsis* reduces levels of sulfated secondary metabolites. *Plant Cell* **21**, 910–  
687 927 (2009).
- 688 54. Geu-Flores, F. *et al.* Glucosinolate engineering identifies a gamma-glutamyl  
689 peptidase. *Nat. Chem. Biol.* **5**, 575–577 (2009).
- 690 55. Kliebenstein, D. J., Lambrix, V. M., Reichelt, M., Gershenzon, J. & Mitchell-Olds,  
691 T. Gene duplication in the diversification of secondary metabolism: tandem 2-  
692 oxoglutarate-dependent dioxygenases control glucosinolate biosynthesis in

- 693 *Arabidopsis*. *Plant Cell* **13**, 681–693 (2001).
- 694 56. Kerwin, R. *et al.* Natural genetic variation in *Arabidopsis thaliana* defense  
695 metabolism genes modulates field fitness. *Elife* **4**, e05604 (2015).
- 696 57. Brachi, B. *et al.* Coselected genes determine adaptive variation in herbivore  
697 resistance throughout the native range of *Arabidopsis thaliana*. *Proc. Natl. Acad.*  
698 *Sci. U.S.A.* **112**, 4032–4037 (2015).
- 699 58. Town, C. D. *et al.* Comparative genomics of *Brassica oleracea* and *Arabidopsis*  
700 *thaliana* reveal gene loss, fragmentation, and dispersal after polyploidy. *Plant Cell*  
701 **18**, 1348–1359 (2006).
- 702 59. Wang, H. *et al.* Glucosinolate biosynthetic genes in *Brassica rapa*. *Gene* **487**,  
703 135–142 (2011).
- 704 60. Field, B. *et al.* Formation of plant metabolic gene clusters within dynamic  
705 chromosomal regions. *Proc. Natl. Acad. Sci. U.S.A.* **108**, 16116–16121 (2011).
- 706 61. Field, B. & Osbourn, A. E. Metabolic diversification—-independent assembly of  
707 operon-like gene clusters in different plants. *Science* **320**, 543–547 (2008).
- 708 62. Shimura, K. *et al.* Identification of a biosynthetic gene cluster in rice for  
709 momilactones. *J Biol Chem* **282**, 34013–34018 (2007).
- 710 63. Swaminathan, S., Morrone, D., Wang, Q., Fulton, D. B. & Peters, R. J. CYP76M7  
711 is an *ent*-cassadiene C11 $\alpha$ -hydroxylase defining a second multifunctional  
712 diterpenoid biosynthetic gene cluster in rice. *Plant Cell* **21**, 3315–3325 (2009).
- 713 64. Itkin, M. *et al.* Biosynthesis of antinutritional alkaloids in solanaceous crops is  
714 mediated by clustered genes. *Science* **341**, 175–179 (2013).
- 715 65. Cárdenas, P. D. *et al.* GAME9 regulates the biosynthesis of steroidal alkaloids and  
716 upstream isoprenoids in the plant mevalonate pathway. *Nat. Commun.* **7**, 10654  
717 (2016).
- 718 66. Frey, M. *et al.* Analysis of a chemical plant defense mechanism in grasses. *Science*  
719 **277**, 696–699 (1997).
- 720 67. Jonczyk, R. *et al.* Elucidation of the final reactions of DIMBOA-glucoside  
721 biosynthesis in maize: characterization of *Bx6* and *Bx7*. *Plant Physiol* **146**, 1053–  
722 1063 (2008).
- 723 68. Meihls, L. N. *et al.* Natural variation in maize aphid resistance is associated with  
724 2,4-dihydroxy-7-methoxy-1,4-benzoxazin-3-one glucoside methyltransferase  
725 activity. *Plant Cell* **25**, 2341–2355 (2013).
- 726 69. Handrick, V. *et al.* Biosynthesis of 8-o-methylated benzoxazinoid defense  
727 compounds in maize. *Plant Cell* **28**, 1682–1700 (2016).
- 728 70. Frey, M. *et al.* An herbivore elicitor activates the gene for indole emission in  
729 maize. *Proc. Natl. Acad. Sci. U.S.A.* **97**, 14801–14806 (2000).
- 730 71. Frey, M., Schullehner, K., Dick, R., Fiesselmann, A. & Gierl, A. Benzoxazinoid  
731 biosynthesis, a model for evolution of secondary metabolic pathways in plants.  
732 *Phytochemistry* **70**, 1645–1651 (2009).
- 733 72. Tzin, V. *et al.* Dynamic maize responses to aphid feeding are revealed by a time  
734 series of transcriptomic and metabolomic assays. *Plant Physiol* **169**, 1727–1743  
735 (2015).
- 736 73. Tzin, V. *et al.* *Spodoptera exigua* caterpillar feeding induces defense responses in  
737 maize leaves as revealed by transcriptome and metabolome analysis. manuscript in  
738 preparation (2016).

- 739 74. Erb, M. *et al.* Indole is an essential herbivore-induced volatile priming signal in  
740 maize. *Nat. Commun.* **6**, 6273 (2015).
- 741 75. Tholl, D., Chen, F., Petri, J., Gershenzon, J. & Pichersky, E. Two sesquiterpene  
742 synthases are responsible for the complex mixture of sesquiterpenes emitted from  
743 *Arabidopsis* flowers. *Plant J.* **42**, 757–771 (2005).
- 744 76. Darbani, B. *et al.* The biosynthetic gene cluster for the cyanogenic glucoside  
745 dhurrin in *Sorghum bicolor* contains its co-expressed vacuolar MATE transporter.  
746 *Sci. Rep.* **6**, 37079 (2016).
- 747 77. Dhingra, S. *et al.* The fumagillin gene cluster, an example of hundreds of genes  
748 under *veA* control in *Aspergillus fumigatus*. *PLoS ONE* **8**, (2013).
- 749 78. Hurst, L., Pal, C. & Lercher, M. The evolutionary dynamics of eukaryotic gene  
750 order. *Nat. Rev. Genet.* **5**, 299–310 (2004).
- 751 79. Lee, J. M. & Sonnhammer, E. L. L. Genomic gene clustering analysis of pathways  
752 in eukaryotes. *Genome Res.* **13**, 875–882 (2003).
- 753 80. Winkel-Shirley, B. Flavonoid biosynthesis. A colorful model for genetics,  
754 biochemistry, cell biology, and biotechnology. *Plant Physiol* **126**, 485–493 (2001).
- 755 81. Zhou, Y. *et al.* Convergence and divergence of bitterness biosynthesis and  
756 regulation in Cucurbitaceae. *Nat Plants* **2**, 16183 (2016).
- 757 82. Sue, M., Nakamura, C. & Nomura, T. Dispersed benzoxazinone gene cluster:  
758 molecular characterization and chromosomal localization of glucosyltransferase  
759 and glucosidase genes in wheat and rye. *Plant Physiol* **157**, 985–997 (2011).
- 760 83. Ballouz, S., Verleyen, W. & Gillis, J. Guidance for RNA-seq co-expression  
761 network construction and analysis: safety in numbers. *Bioinformatics* **31**, 2123–  
762 2130 (2015).
- 763 84. Ralph, S. G., Yueh, H. & Friedmann, M. Conifer defence against insects:  
764 microarray gene expression profiling of Sitka spruce (*Picea sitchensis*) induced by  
765 mechanical wounding or feeding by spruce budworms (*Choristoneura*  
766 *occidentalis*) or white pine weevils (*Pissodes strobi*) reveals large-scale changes of  
767 the host transcriptome. *Plant Cell Environ* **29**, 1545–1570 (2006).
- 768 85. Richards, C. L., Rosas, U., Banta, J., Bhambhra, N. & Purugganan, M. D.  
769 Genome-wide patterns of *Arabidopsis* gene expression in nature. *PLoS Genet.* **8**,  
770 e1002662 (2012).
- 771 86. Hartmann, T. & Ober, D. Biosynthesis and metabolism of pyrrolizidine alkaloids  
772 in plants and specialized insect herbivores in *Biosynthesis: Aromatic Polyketides,*  
773 *Isoprenoids, Alkaloids* **209**, 207–243 (Springer Berlin Heidelberg, 2000).
- 774 87. Eddy, S. R. Accelerated profile HMM searches. *PLoS Comput. Biol* **7**, e1002195  
775 (2011).
- 776
- 777

778 **Supplemental files**

779 Dataset S1. Co-expression modules (txt).

780 Figure S1. Co-expression network pipeline (pdf).

781 Figure S2. MetaCyc pathway enrichment analysis of experimentally characterized genes  
782 in *A. thaliana* (pdf).

783 Figure S3. Overlapping co-expressed modules recover the pathway for metGSL  
784 biosynthesis in *A. thaliana* (pdf).

785 Figure S4. Comparison of degree of gene co-expression in core versus terminal  
786 modification genes in metGSL biosynthesis (pdf).

787 Figure S5. Maximum likelihood phylogeny of Brassicaceae MAM and IPMS sequences  
788 (pdf).

789 Figure S6. Maximum likelihood phylogeny of Brassicaceae GSTU sequences (pdf).

790 Figure S7. Network maps of co-expression modules involved in thalianol and marneral  
791 triterpenoid biosynthesis in *A. thaliana* (pdf).

792 Figure S8. Network map of co-expression module involved in momilactone and  
793 phytocassane diterpenoid biosynthesis in *O. sativa* (pdf).

794 Figure S9. Network maps of co-expression modules involved in tomatine biosynthesis in  
795 *S. lycopersicum*. (pdf).

796 Figure S10. Pathway diagram and network map of DIMBOA biosynthesis and related  
797 pathways in *Z. mays* (pdf).

798 Figure S11. Gene expression response to insect feeding in *Z. mays* (pdf).

799 Figure S12. Coexpression pattern of seven putative BGCs in plants (pdf).

800 Figure S13. Comparison of Mutual Rank-based and Pearson's correlation-based networks

- 801 (pdf).
- 802 Table S1. Downloaded datasets (xlsx).
- 803 Table S2. Descriptive statistics for co-expression networks (xlsx).
- 804 Table S3. *A. thaliana* genes assigned to MetaCyc pathways and pathway ontologies
- 805 (xlsx).
- 806 Table S4. Test for enrichment/depletion of MetaCyc pathway categories and classes in
- 807 module genes (xlsx).
- 808 Table S5. Recovery of MetaCyc pathways in co-expression modules (xlsx).
- 809 Table S6. List of Pfam domains found in SM pathways in MetaCyc (xlsx).
- 810 Table S7. metGSL biosynthesis genes in *A. thaliana* and *B. rapa* (xlsx).
- 811 Table S8. Recovery of metGSL pathways, characterized BGCs, and putative BGCs in co-
- 812 expression modules (xlsx).
- 813 Table S9. List of functionally characterized BGCs in plants with co-expression data on
- 814 ATTED-II (xlsx).
- 815 Table S10. Average co-expression of gene modules, characterized BGCs, and putative
- 816 BGCs (xlsx).
- 817 Table S11. GO enrichment test of a 46-gene *A. thaliana* module involved in flower
- 818 development (xlsx).



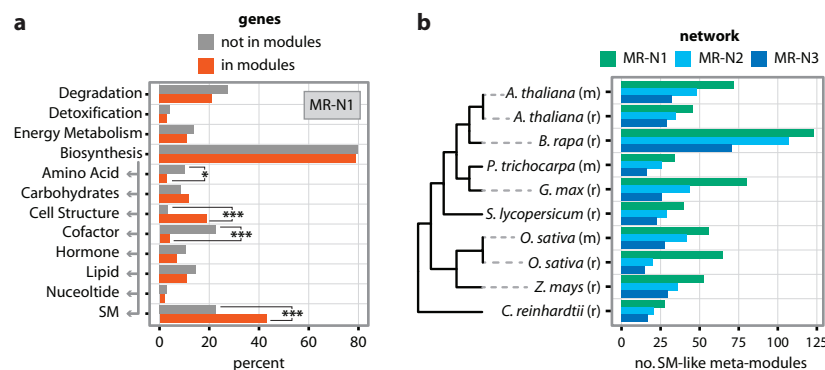

**Figure 1. Global co-expression network analysis of eight plant genomes identify co-expressed modules of specialized metabolic genes.** a) MetaCyc pathway enrichment analysis of experimentally characterized *A. thaliana* genes assigned to modules (orange bars) relative to those that do not form modules (grey bars) in *A. thaliana* microarray-based network MR-N1. Grey arrow indicates that the bottom eight pathway categories are children of 'Biosynthesis' in the MetaCyc hierarchy. Asterisks denote significant enrichment or depletion of MetaCyc categories in module genes; \* $P \leq 0.05$ , \*\*\* $P \leq 0.0005$  (Benjamini & Hochberg adjusted  $P$ -values, hypergeometric test). See Figure S2 for enrichment tests in other *A. thaliana* networks. b) Count of SM-like meta-modules identified in 10 microarray (m) and RNAseq (r) co-expression datasets from eight Viridiplantae. SM-like modules were collapsed into meta-modules of non-overlapping gene sets. Networks were constructed using three different rates of exponential decay for converting MR scores to edge weights, where MR-N1 corresponds to smallest network with the steepest rate of decay and therefore the fewest edges; conversely, MR-N3 is the largest network with the shallowest rate of decay and the most edges.

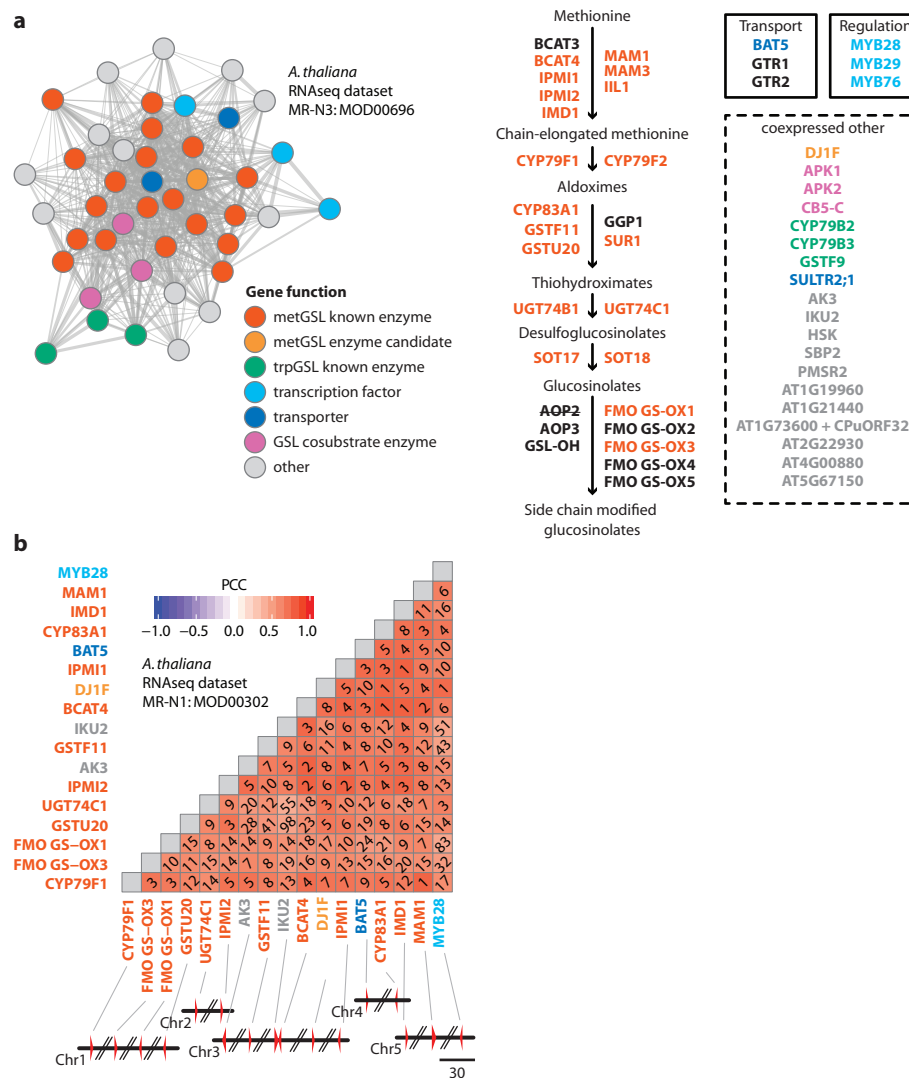

**Figure 2. Co-expression modules efficiently recover the majority of genes for metGSL biosynthesis in *A. thaliana*.** a) Network map of an example co-expression module involved in metGSL biosynthesis. Nodes in the map represent genes and edges connecting two genes represent the weight (transformed MR score) for the association. The diagram of the metGSL biosynthesis pathway is depicted, right. Other co-expressed genes not known to be involved in metGSL biosynthesis are shown in the dashed box. Nodes and gene names are colored according to their known or putative function. MetGSL genes not recovered in modules are colored black. Genes not present in the co-expression dataset are lined out. b) Heatmap depicting the correlation of co-expression of a second example co-expression module involved in metGSL biosynthesis. Diagonal numbers within the heatmap indicate MR score. Gene names are colored as in part a. Module genes are depicted as red triangles in the accompanying chromosome segments (parallel lines indicate the genes are not physically co-located; scale bar is in kilobase pairs). Note: data from the RNAseq-based networks are shown as two metGSL genes (*SOT17* and *SOT18*) are not present in the microarray dataset. Microarray-based networks performed similarly (Table S8).

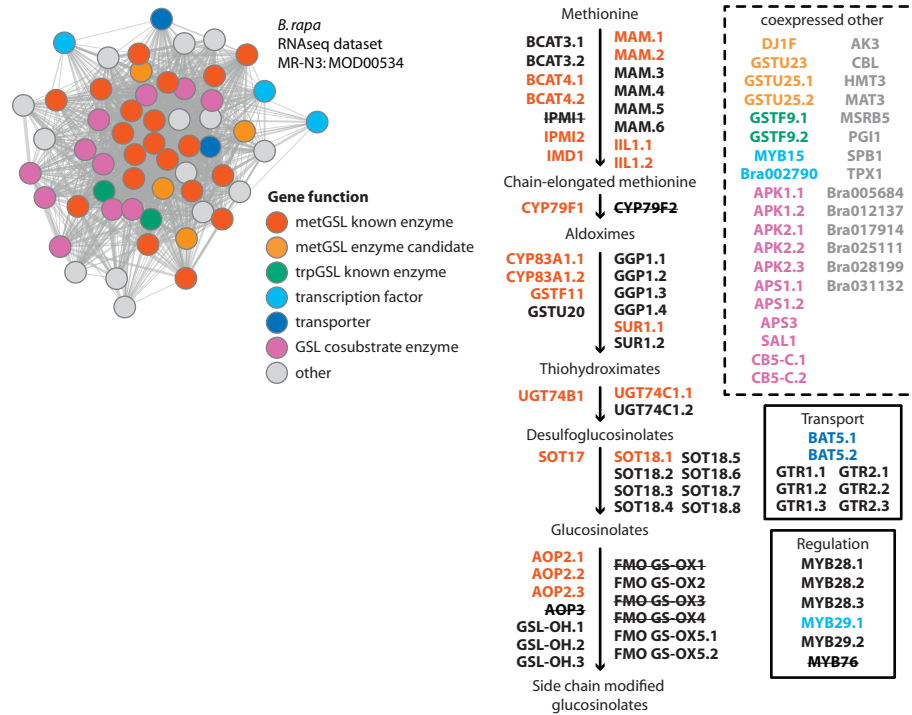

**Figure 3. Co-expression modules predict functional metGSL biosynthesis genes in *B. rapa*.** Network map of an example co-expression module involved in metGSL biosynthesis. Nodes in the map represent genes and edges connecting two genes represent the weight (transformed MR score) for the association. The diagram of the metGSL biosynthesis pathway is depicted, right, with all predicted orthologs to known metGSL genes in *A. thaliana* as listed on brassicadb.org. Other co-expressed genes not known to be involved in metGSL biosynthesis are shown in the dashed box. Nodes and gene names are colored according to their known or putative function. MetGSL orthologs not recovered in modules are colored black. *A. thaliana* metGSL genes with no known ortholog in *B. rapa* are lined out. See Table S7 for associated NCBI and Ensembl gene IDs.

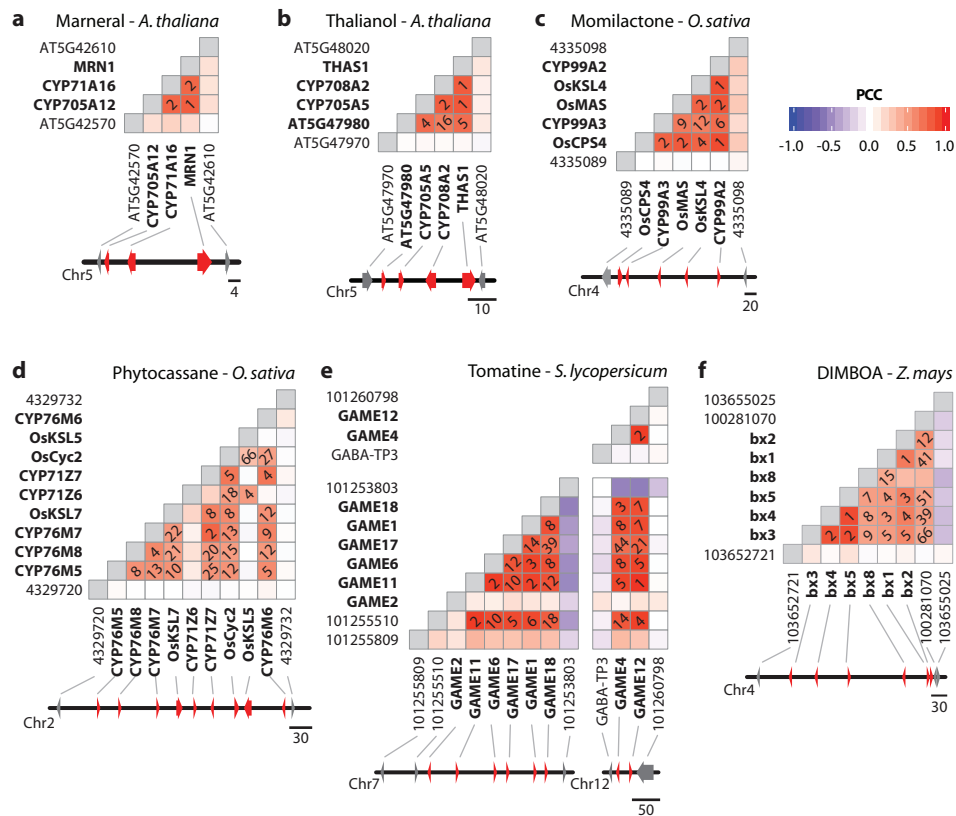

**Figure 4. Co-expression pattern of six functionally characterized BGCs in plants.** Heatmaps depict the correlation of co-expression of six BGCs for the production of a. marneral, b. thalianol, c. momilactone, d. phytocassane, e. tomatine, and f. DIMBOA. Diagonal numbers indicate MR scores; squares are blank if MR  $\geq 100$ . BGC genes are bolded in the heatmap and colored red in the accompanying chromosome segments. Scale bars are in kilobase pairs.

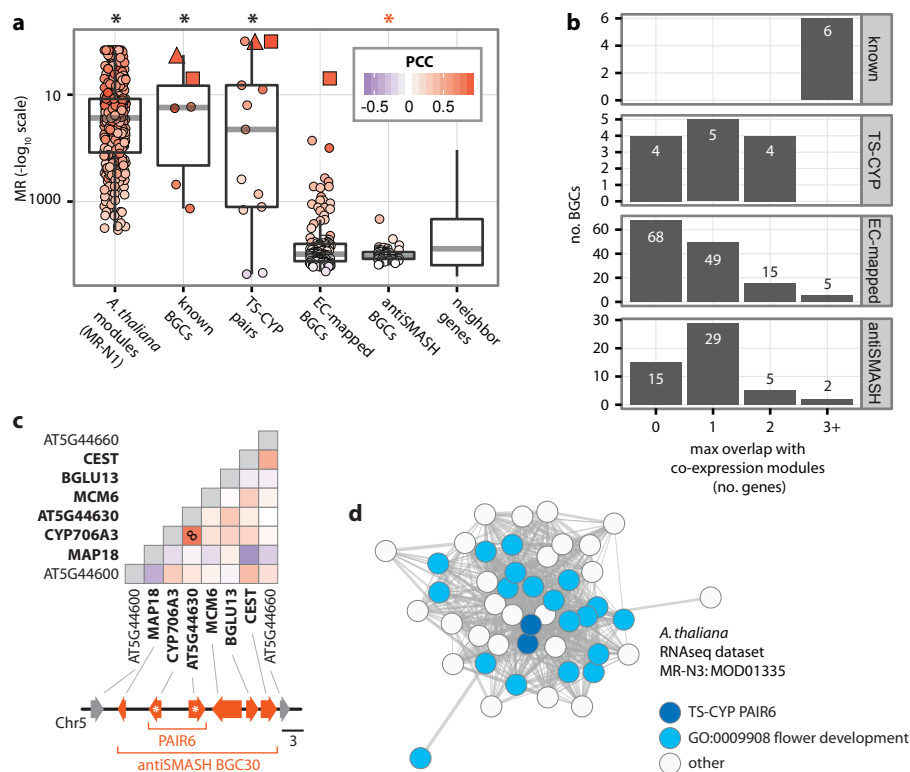

**Figure 5. The genes comprising the majority of bioinformatically predicted BGCs are not co-expressed.** a) Comparison of average co-expression of modules versus characterized and putative BGCs. The bottom and top of each box plot correspond to the first and third quartiles (the 25th and 75th percentiles), respectively. The lower whisker extends from the box bottom to the lowest value within 1.5 \* IQR (Inter-Quartile Range, defined as the distance between the first and third quartiles) of the first quartile. The upper whisker extends from the box top to the highest value that is within 1.5 \* IQR of the third quartile. Red squares and triangles indicate BGCs or gene pairs that correspond to the all or part of the thalianol and marneral BGCs, respectively. Asterisks denote significant deviation from the control distribution of neighboring genes; \* $P \leq 0.05$  (Wilcoxon rank sum tests). b) From top to bottom, histogram of maximum overlap between co-expression modules and known (characterized) BGCs, TS-CYP gene pairs, EC-mapped BGCs, and antiSMASH BGCs. c) Heatmap depicting the correlation of co-expression for a eight-gene region of chromosome five in *A. thaliana* containing an example antiSMASH BGC (BGC30) and TS-CYP gene pair (PAIR6). Diagonal number indicates MR score; squares are blank if MR  $\geq 100$ . Heatmap scale is the same as in part a. BGC genes are bolded in the heatmap and colored red in the accompanying chromosome segments (TS-CYP pair is marked with asterisks). Scale bars are in kilobase pairs. d) Network map of a module that maximally overlaps with BGC30. Overlapping genes (TS-CYP PAIR6) are colored dark blue.
